# Supplementary material for: Surface charge effects on the 2D conformation of supercoiled DNA
Source: Royal Society of Chemistry journal article supplement (doi:10.1039/c3sm53071j), 2014-01-01
Supplement: c3sm53071j1.pdf [file c3sm53071j1.pdf]

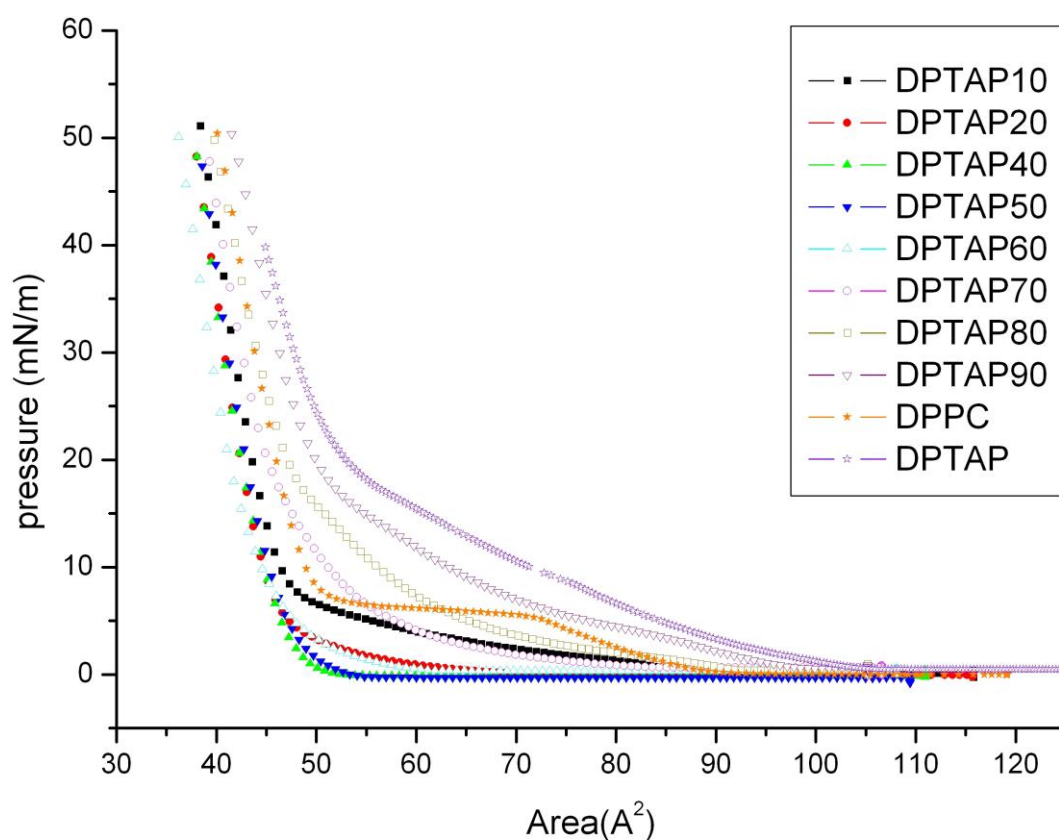

Fig. S1: Langmuir isotherms of pure and mixed dppc and dptap monolayers at the air water interface. for pure dppc, there is a le/lo coexistence plateau which disappears when dptap is incorporated to the monolayer. for small contents in dptap, the transition le/lo is shifted to the smaller areas, whereas for dptap contents above 50%, the transition is shifted to the larger areas.

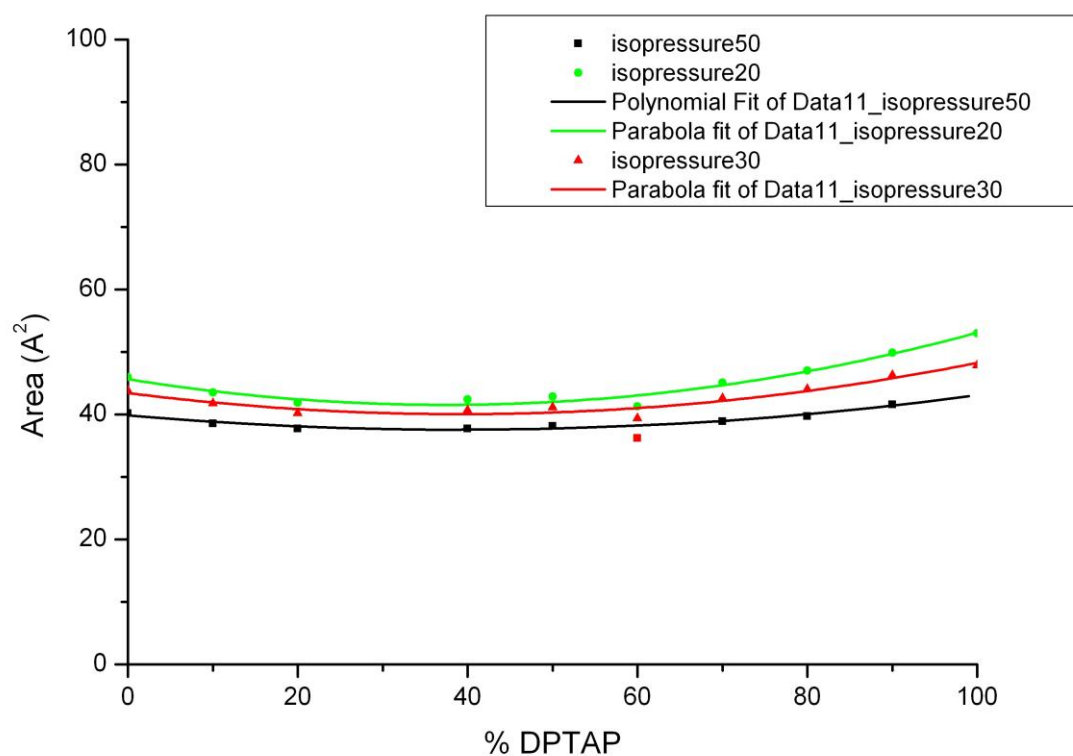

Fig. S2: Isopressure data of the area per lipids head in mixed dppc/dptap monolayers as a function of the dptap fraction, measured at a pressure of 20 mn/m (green circles), 30 mn/m (red triangles), and 50 mn/m (black squares).

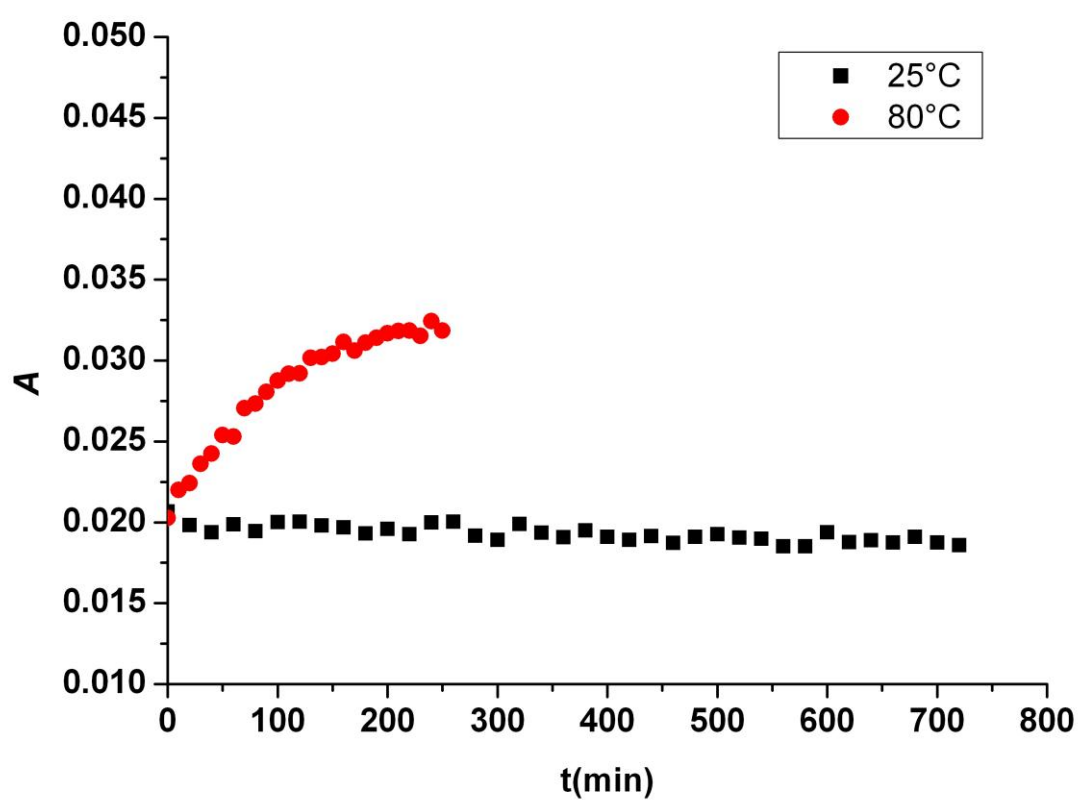

Fig. S3: Absorbance at 260 nm of puc19 plasmids diluted in miliq water as a function of time at rt (black squares) and at 80°C (red circles).
